# Supplementary material for: Tract-specific analysis improves sensitivity of spinal cord diffusion MRI to cross-sectional and longitudinal changes in amyotrophic lateral sclerosis
Source: PubMed Central journal article supplement (PMC7351722; doi:10.1038/s42003-020-1093-z), 2020-07-10
Supplement: 42003_2020_1093_MOESM4_ESM.pdf [file 42003_2020_1093_MOESM4_ESM.pdf]

## **Description of additional Supplementary Items**

**Supplementary Data 1.** Source data used to generate the charts present in the manuscript.
